# Supplementary material for: Characterization of a novel androgen receptor (AR) coregulator RIPK1 and related chemicals that suppress AR-mediated prostate cancer growth via peptide and chemical screening
Source: PubMed Central journal article supplement (PMC5642495; doi:10.18632/oncotarget.17843), 2017-05-13
Supplement: oncotarget-08-69508-s001.pdf [file oncotarget-08-69508-s001.pdf]

# Characterization of a novel androgen receptor (AR) coregulator RIPK1 and related chemicals that suppress AR-mediated prostate cancer growth via peptide and chemical screening

## Supplementary Materials

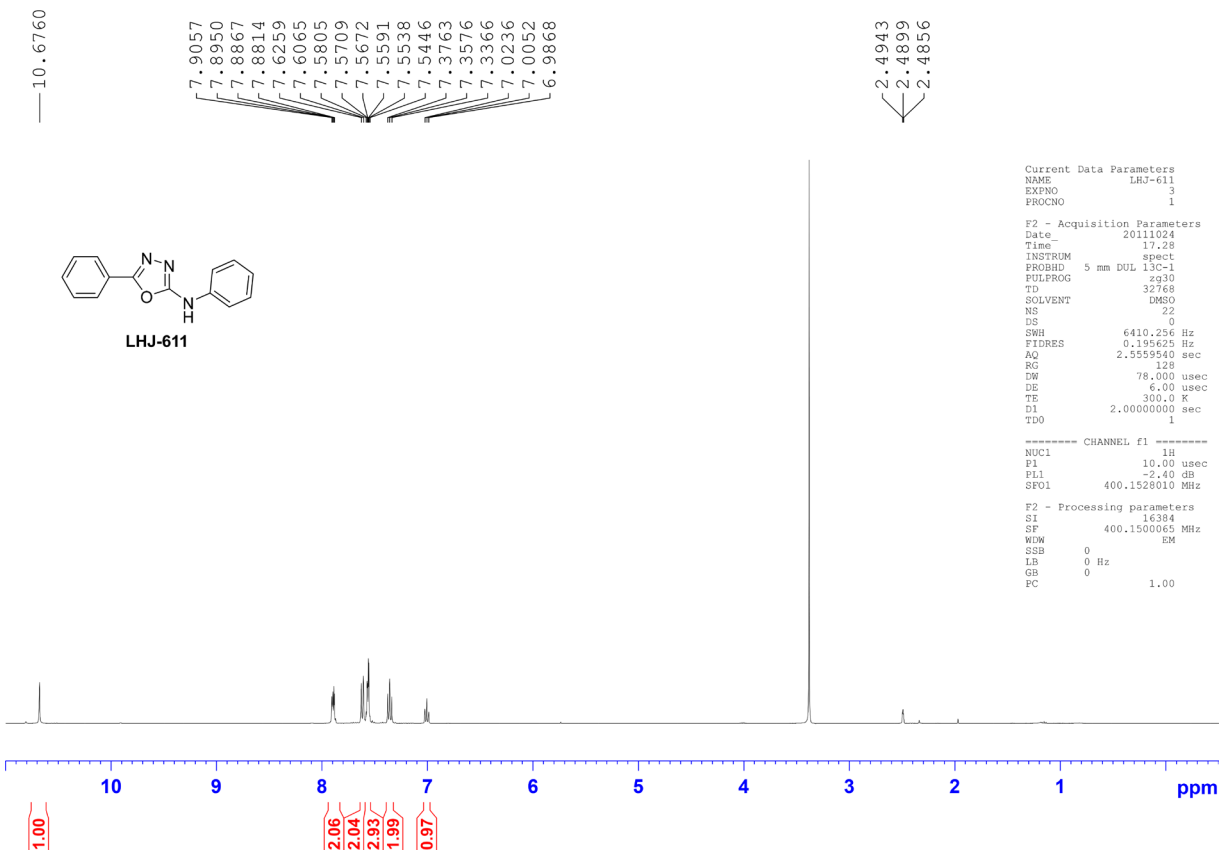

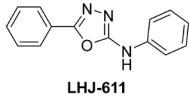

159.9184  
157.7449

138.6302  
130.9529  
129.3293  
129.0934  
125.5364  
123.8488  
121.8997  
117.0776

40.1258  
39.9159  
39.7087  
39.4992  
39.2905  
39.0819  
38.8754

Current Data Parameters  
NAME LHJ-611-13C.fid  
EXPNO 1  
PROCNO 1  
F2 - Processing parameters  
SI 65536  
SF 100.5219769 MHz  
WDW EM  
SSB 0  
LB 0.30 Hz  
GB 0  
PC 1.00

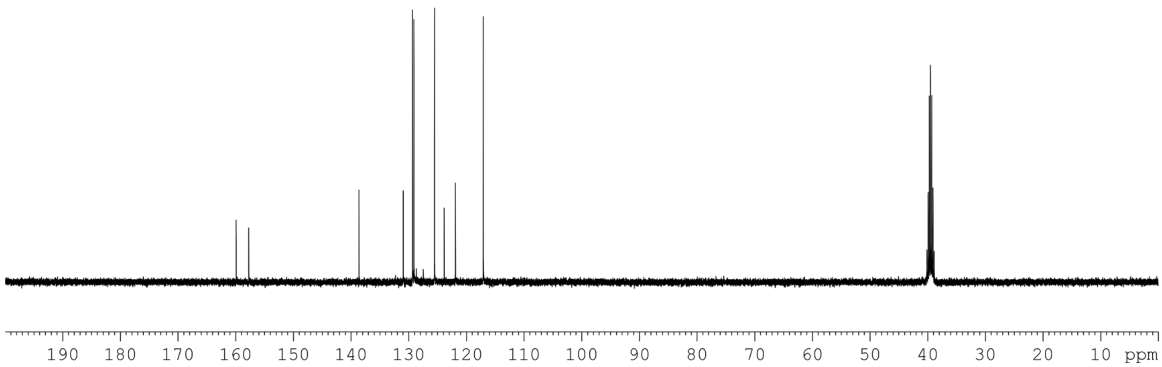

LHJ-611 (HR-ESI MS)  
Elemental Composition Report

Single Mass Analysis

Tolerance = 100.0 PPM / DBE: min = -100.0, max = 1000.0  
Element prediction: Off  
Number of isotope peaks used for i-FIT = 2

Monoisotopic Mass, Even Electron Ions  
15 formula(e) evaluated with 1 results within limits (all results (up to 1000) for each mass)  
Elements Used:  
C: 0-1000 H: 0-4000 N: 3-3 O: 1-1  
LHJ-611

KE267

1031\_LHJ-611 34 (3.365) Cm (34:35:2)

Page 1

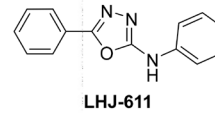

31-Oct-2011  
13:46:34  
2: TOP MS ES-  
1.66e+004

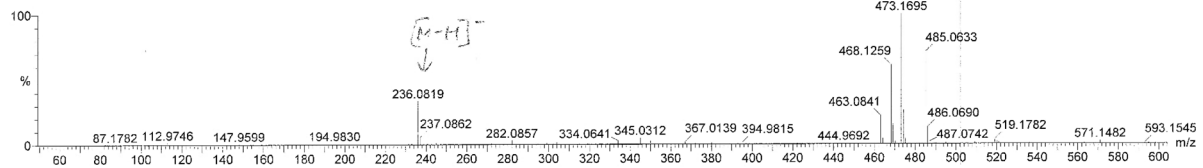

| Mass     | Calc. Mass | mDa  | PPM  | DBE  | i-FIT | i-FIT (Norm) | Formula      |
|----------|------------|------|------|------|-------|--------------|--------------|
| 236.0819 | 236.0824   | -0.5 | -2.1 | 11.5 | 34.9  | 0.0          | C14 H10 N3 O |

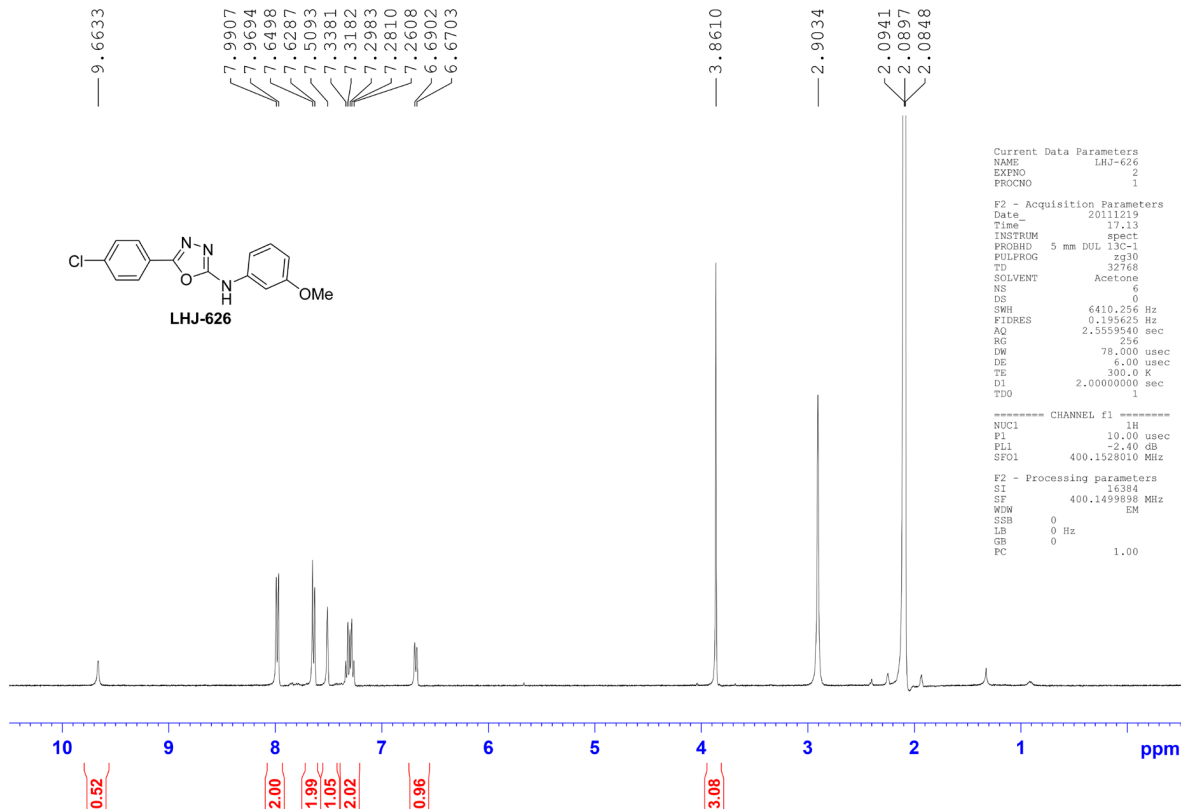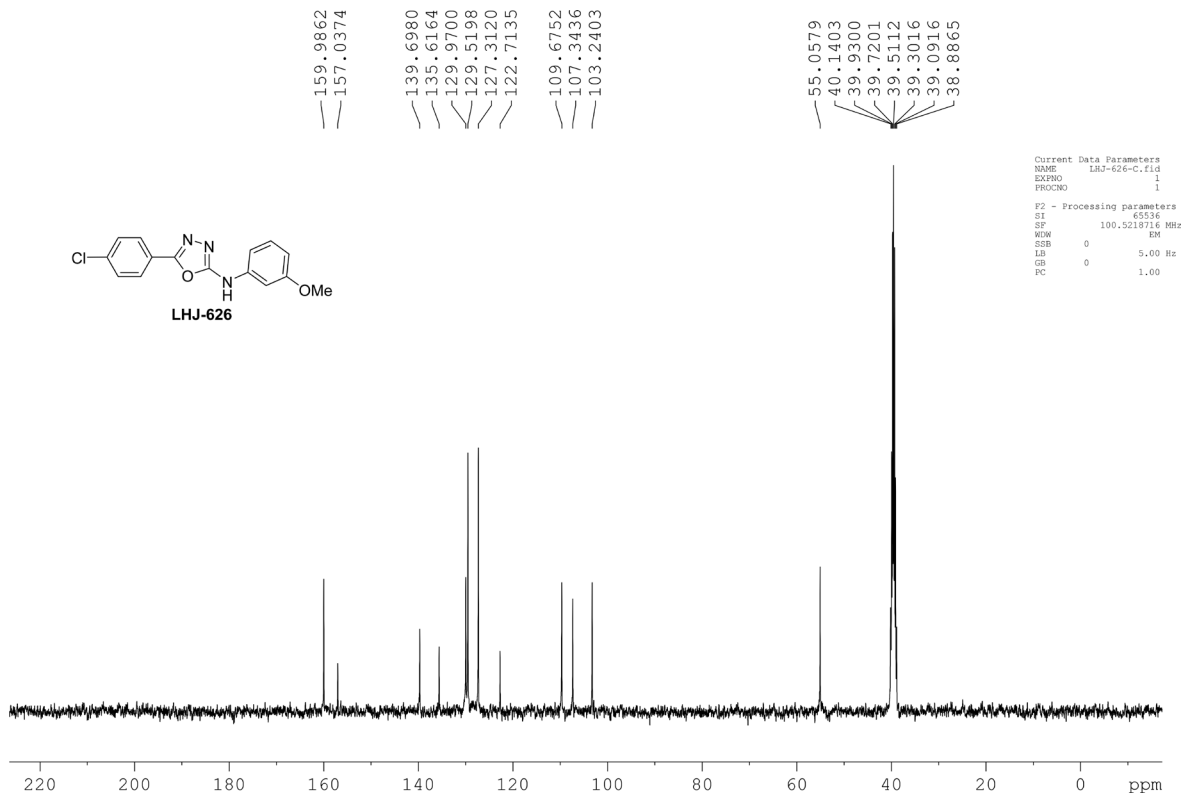

LHJ-626 (cur-E51mg)

### Elemental Composition Report

#### Single Mass Analysis

Tolerance = 100.0 PPM / DBE: min = -100.0, max = 1000.0  
Element prediction: Off  
Number of isotope peaks used for i-FIT = 2

#### Monoisotopic Mass, Even Electron Ions

17 formula(e) evaluated with 1 results within limits (all results (up to 1000) for each mass)

#### Elements Used:

C: 0-4000 H: 0-4000 N: 3-3 O: 2-2 Cl: 1-1

LHJ-626

0113\_LHJ-626 22 (2.189)

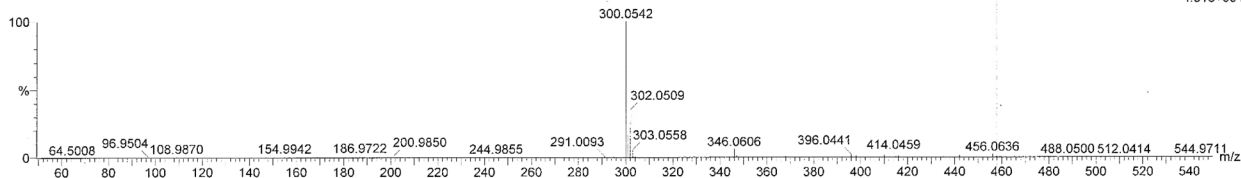

| Mass     | Calc. Mass | mDa | PPM | DBE  | i-FIT | i-FIT (Norm) | Formula          |
|----------|------------|-----|-----|------|-------|--------------|------------------|
| 300.0542 | 300.0540   | 0.2 | 0.7 | 11.5 | 102.0 | 0.0          | C15 H11 N3 O2 Cl |

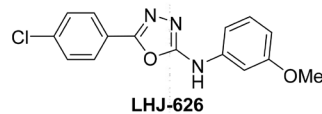

13-Jan-2012  
12:45:16  
2: TOF MS ES-  
4.31e+004

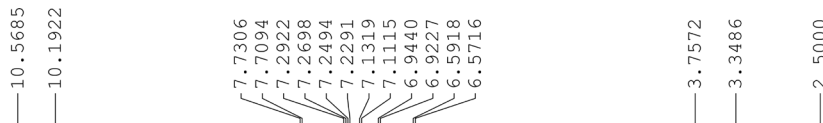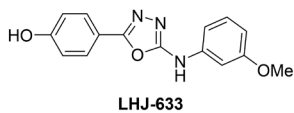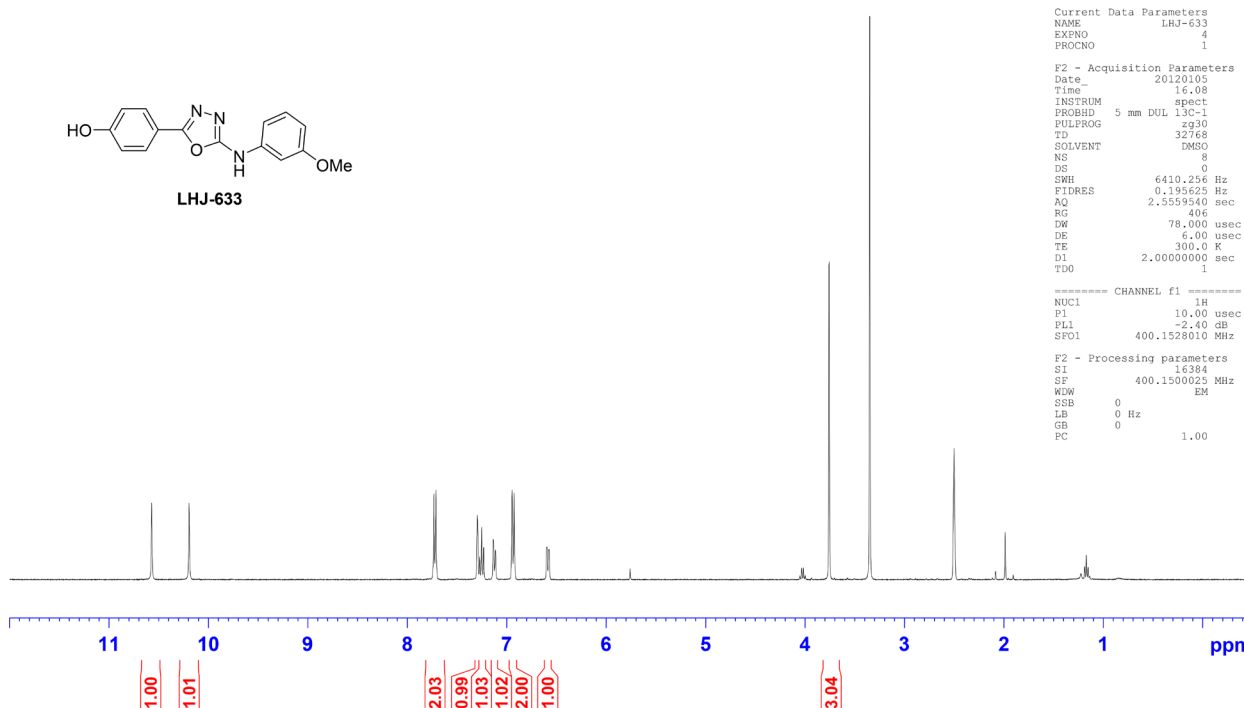

Current Data Parameters  
NAME LHJ-633  
EXPNO 4  
PROCNO 1

F2 - Acquisition Parameters  
Date\_ 20120105  
Time 16.08  
INSTRUM spect  
PROBHD 5 mm DUL 13C-1  
PULPROG zg30  
TD 32768  
SOLVENT DMSO  
NS 8  
DS 0  
SWH 6410.256 Hz  
FIDRES 0.195625 Hz  
AQ 2.5559540 sec  
RG 406  
DW 78.000 usec  
DE 6.00 usec  
TE 300.0 K  
D1 2.00000000 sec  
TD0 1

===== CHANNEL f1 =====  
NUC1 1H  
P1 10.00 usec  
PL1 -2.40 dB  
SFO1 400.1528010 MHz

F2 - Processing parameters  
SI 16384  
SF 400.1500025 MHz  
WDW EM  
SSB 0  
LB 0 Hz  
GB 0  
PC 1.00

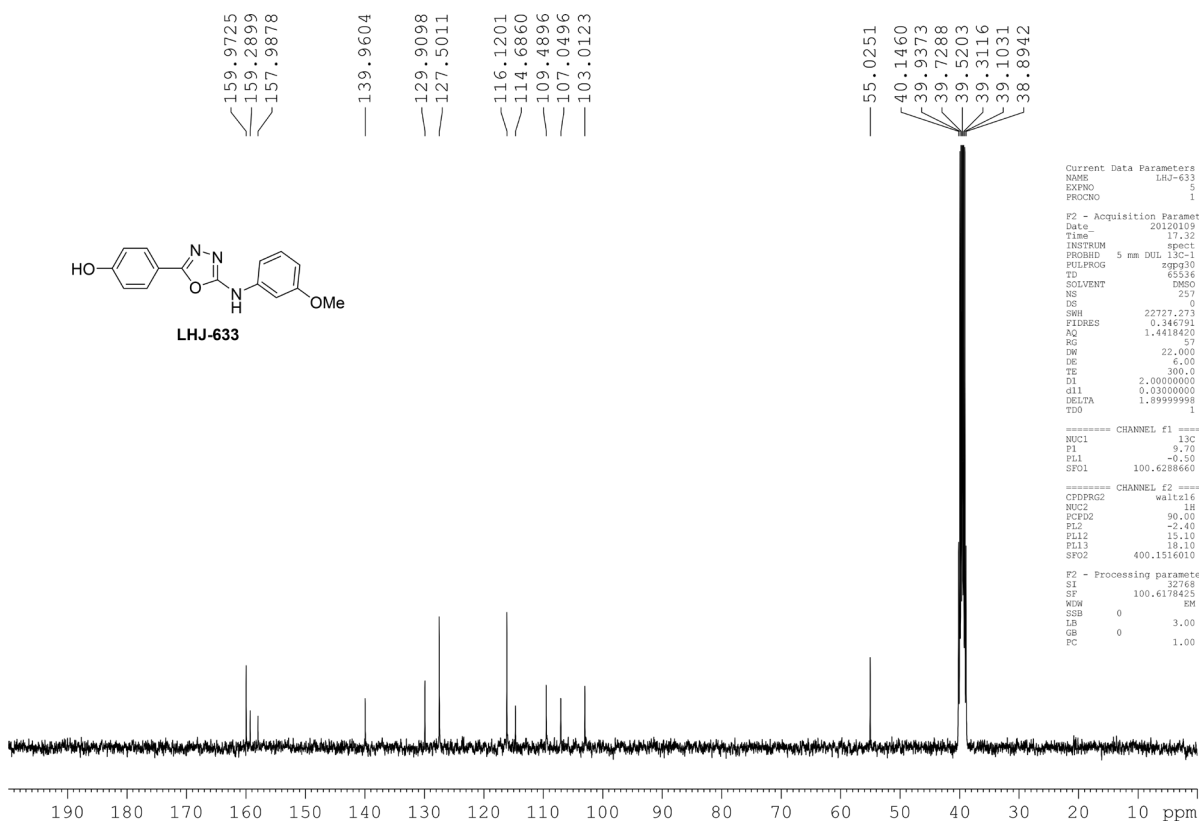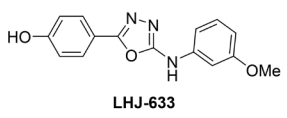

```

Current Data Parameters
NAME      LHJ-633
EXPNO     5
PROCNO    1

F2 - Acquisition Parameters
Date_     20120109
Time      17.32
INSTRUM   spect
PROBHD    5 mm DUL 13C-1
PULPROG   zgpg30
TD         65536
SOLVENT   DMSO
NS         227
DS         0
SWH        22727.273 Hz
FIDRES     0.346791 Hz
AQ         1.4418420 sec
RG         57
DW         22.000 use
DE         6.00 use
TE         300.0 K
D1         2.0000000 sec
d11        0.0300000 sec
DELTA     1.8999999 sec
TDO        1

===== CHANNEL f1 =====
NUC1       13C
P1         9.70 use
PL1        -0.50 dB
SFO1      100.6288600 MHz

===== CHANNEL f2 =====
CFDPRG2   waitz16
NUC2       1H
PCPD2     90.00 use
PL2        -2.40 dB
PL12       15.10 dB
PL13       18.10 dB
SFO2      400.1516010 MHz

F2 - Processing parameters
SI         32768
SF         100.6178425 MHz
WDW        EM
SSB        0
LB         3.00 Hz
GB         0
PC         1.00
  
```

LHJ-633 (HR-ESI MS)

### Elemental Composition Report

**Single Mass Analysis**  
 Tolerance = 100.0 PPM / DBE: min = -100.0, max = 1000.0  
 Element prediction: Off  
 Number of isotope peaks used for i-FIT = 2

Monoisotopic Mass, Even Electron Ions  
 35 formula(e) evaluated with 1 results within limits (all results (up to 1000) for each mass)  
 Elements Used:  
 C: 0-4000 H: 0-4000 N: 3-3 O: 2-3  
 LHJ-633

0113\_LHJ-633 21 (2.110) Cm (21-101x5.000)

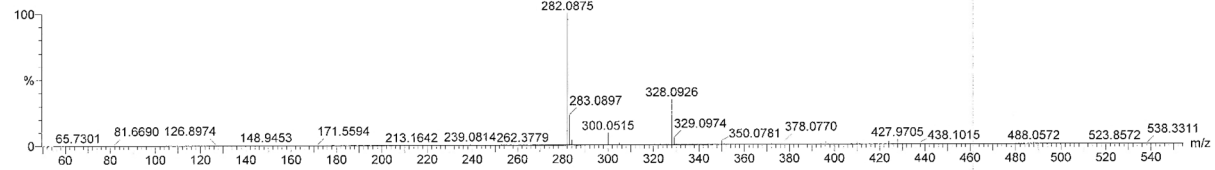

| Mass     | Calc. Mass | mDa  | PPM  | DBE  | i-FIT | i-FIT (Norm) | Formula       |
|----------|------------|------|------|------|-------|--------------|---------------|
| 282.0875 | 282.0879   | -0.4 | -1.4 | 11.5 | 90.1  | 0.0          | C15 H12 N3 O3 |

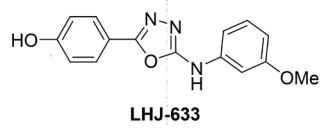

Page 1  
 13-Jan-2012  
 12:56:28  
 2: TOF MS ES-  
 1.01e+004

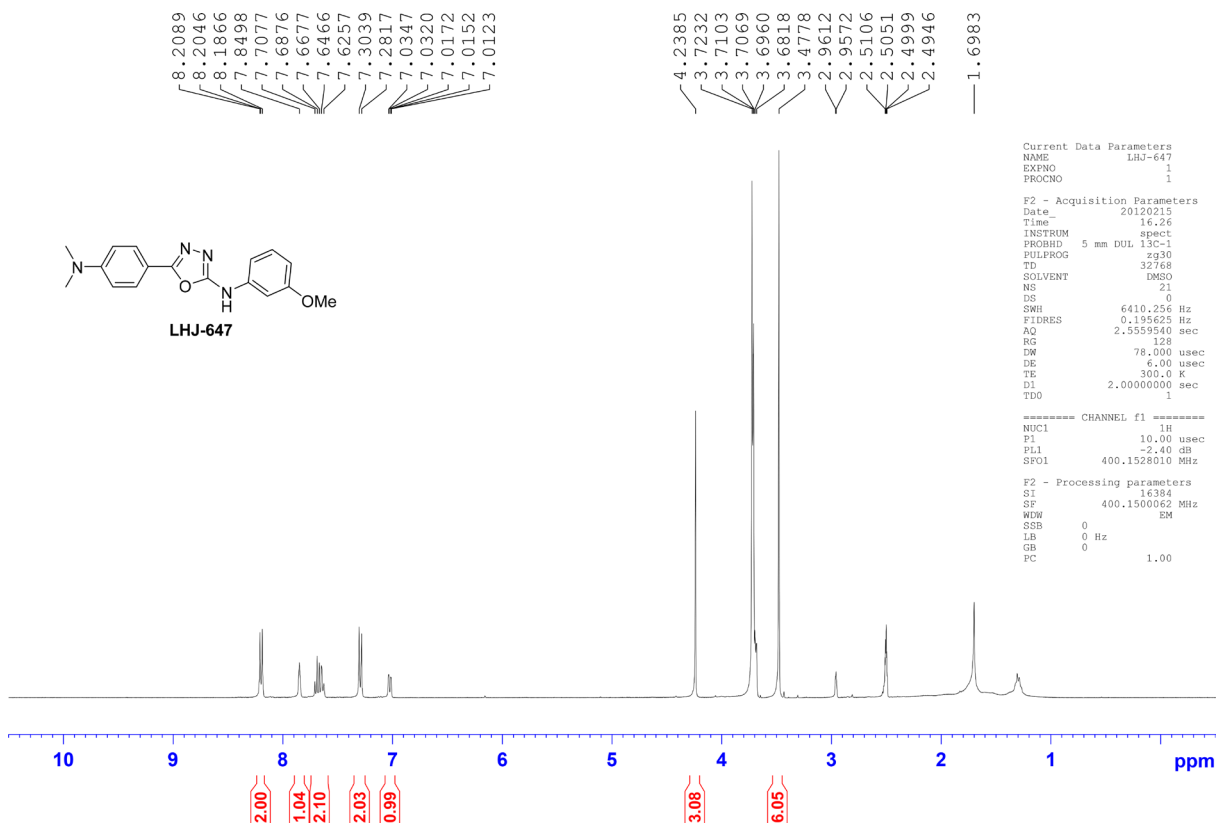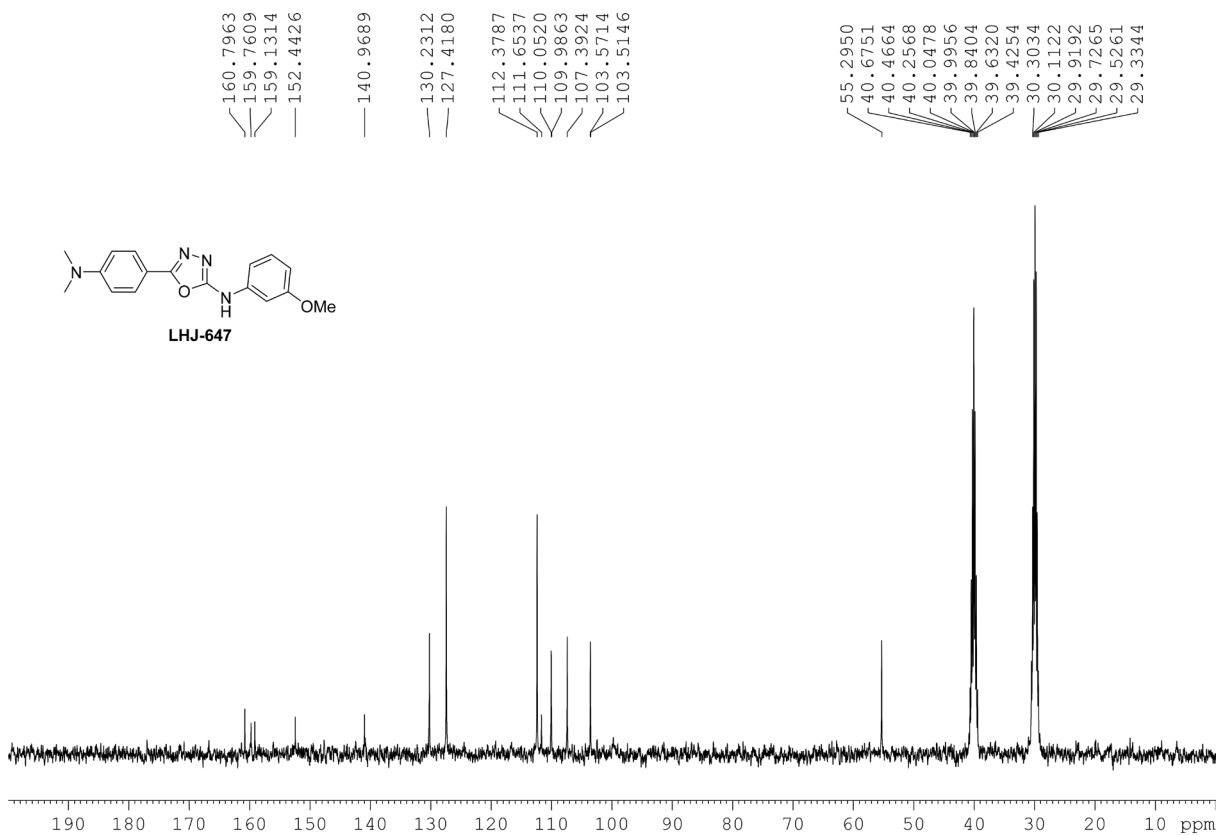

LHJ-647 (HR-ESI-MS)

Elemental Composition Report

Single Mass Analysis

Tolerance = 20.0 PPM / DBE: min = -100.0, max = 1000.0  
Element prediction: Off  
Number of isotope peaks used for i-FIT = 2

Monoisotopic Mass, Even Electron Ions  
18 formula(e) evaluated with 1 results within limits (all results (up to 1000) for each mass)  
Elements Used:  
C: 0-4000 H: 0-4000 N: 4-4 O: 2-2  
LHJ-647

0221\_LHJ-647 29 (2.896) Cm (29-101x10.000)

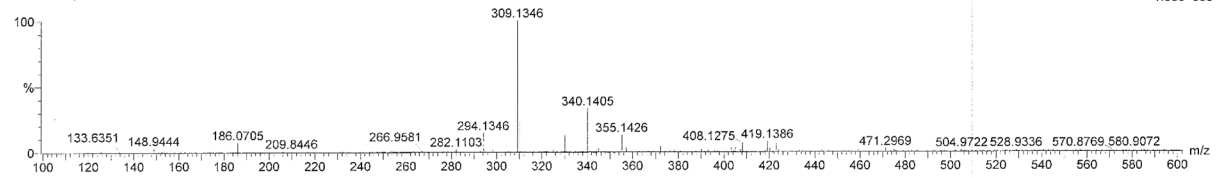

| Mass     | Calc. Mass | mDa  | PPM  | DBE  | i-FIT | i-FIT (Norm) | Formula       |
|----------|------------|------|------|------|-------|--------------|---------------|
| 309.1346 | 309.1352   | -0.6 | -1.9 | 11.5 | 37.6  | 0.0          | C17 H17 N4 O2 |

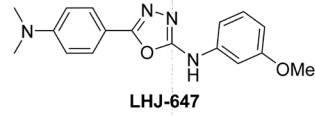

21-Feb-2012  
16:14:35  
2: TOF MS ES-  
1.08e+003

10.5662

8.1447  
8.1233  
7.9954  
7.9749  
7.9737  
7.7353  
7.7158  
7.3898  
7.3709  
7.3501  
7.0590  
7.0406  
7.0220

2.0609  
2.0553  
2.0501  
2.0444  
2.0393

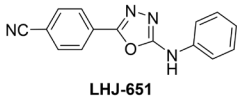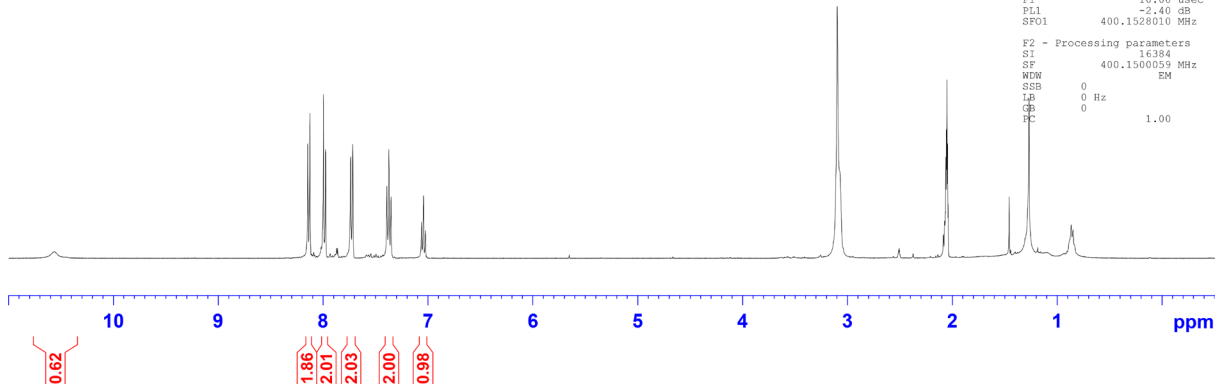

Current Data Parameters  
NAME LHJ-651  
EXFNO 5  
PROCNO 1

F2 - Acquisition Parameters  
Date 20120223  
Time 15.29  
INSTRUM spect  
PROBHD 5 mm DUL 13C-1  
PULPROG zg30  
TD 32768  
SOLVENT Acetone  
NS 19  
DS 0  
SWH 6410.256 Hz  
FIDRES 0.195625 Hz  
AQ 2.5559540 sec  
RG 287  
DW 78.000 usec  
DE 6.00 usec  
TE 300.0 K  
D1 2.00000000 sec  
TDO 1

----- CHANNEL f1 -----  
NUC1 1H  
P1 10.00 usec  
PL1 -2.40 dB  
SFO1 400.1528010 MHz

F2 - Processing parameters  
SI 16384  
SF 400.1500059 MHz  
WDW EM  
SSB 0  
LA 0 Hz  
GB 0  
PC 1.00

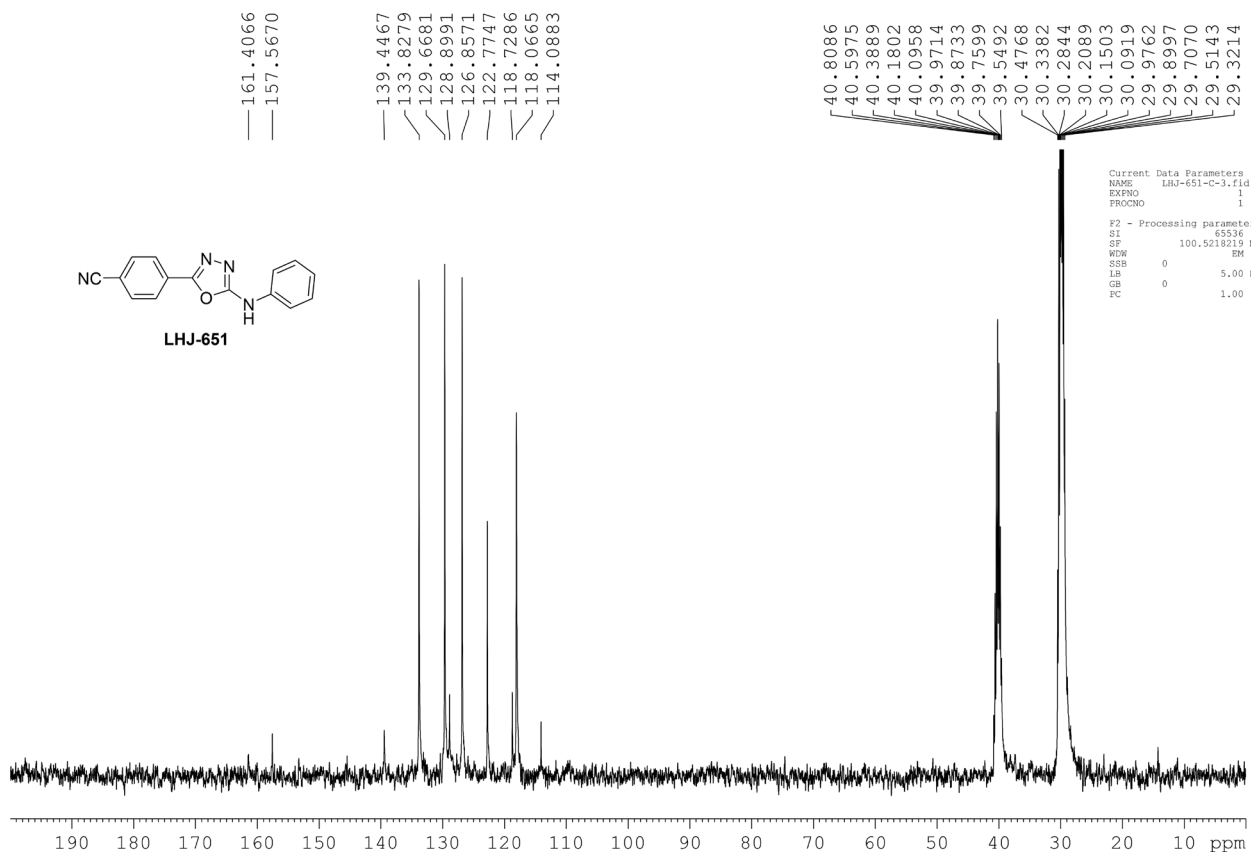

LHJ-651 (HR ESI neg)

Elemental Composition Report

Single Mass Analysis

Tolerance = 50.0 PPM / DBE: min = -100.0, max = 1000.0  
 Element prediction: Off  
 Number of isotope peaks used for i-FIT = 2

Monoisotopic Mass, Even Electron Ions  
 16 formula(e) evaluated with 1 results within limits (all results (up to 1000) for each mass)  
 Elements Used:

C: 0-4000 H: 0-4000 N: 4-4 O: 1-1  
 LHJ-651

0328\_LHJ-651 10 (1.013)

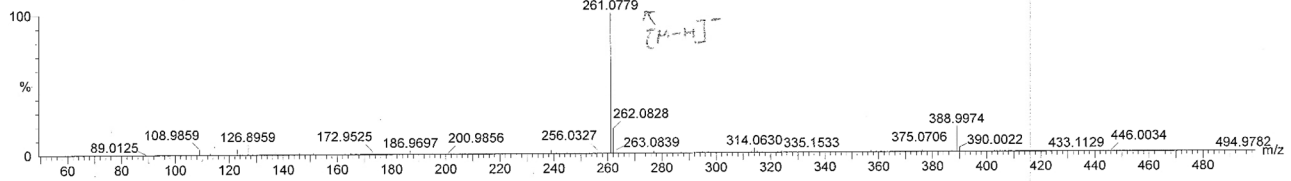

Minimum: -100.0  
 Maximum: 5.0 50.0 1000.0

| Mass     | Calc. Mass | mDa | PPM | DBE  | i-FIT | i-FIT (Norm) | Formula     |
|----------|------------|-----|-----|------|-------|--------------|-------------|
| 261.0779 | 261.0776   | 0.3 | 1.1 | 13.5 | 81.4  | 0.0          | C15 H9 N4 O |

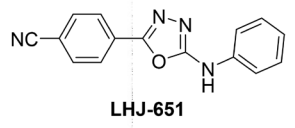



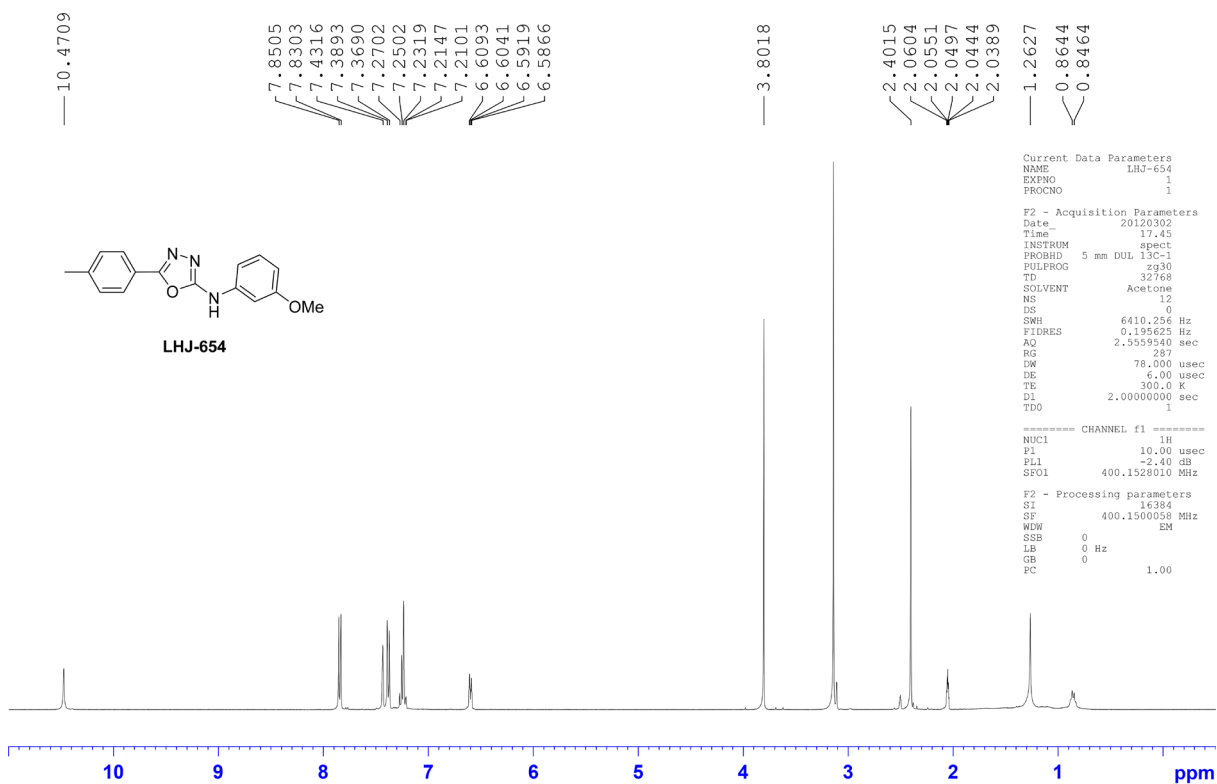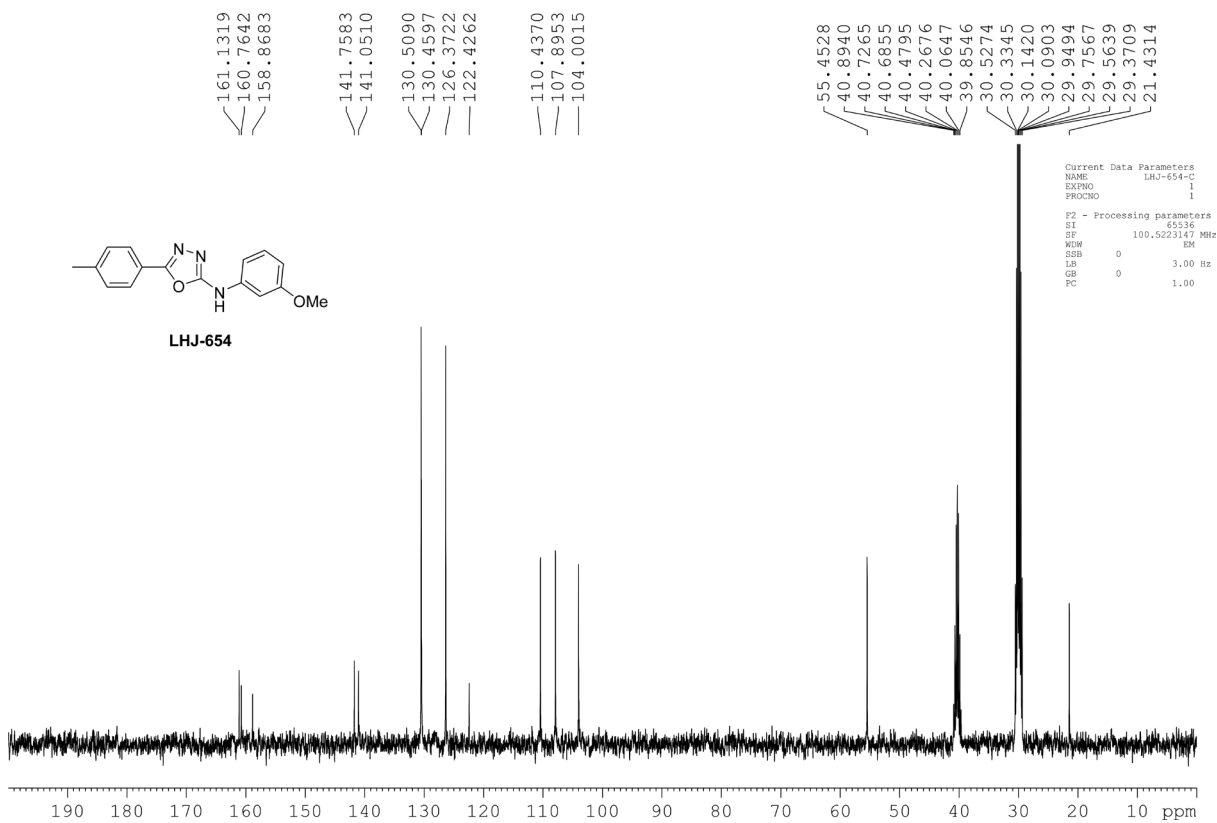

LHJ-654 (HR-ESI neg)

### Elemental Composition Report

#### Single Mass Analysis

Tolerance = 20.0 PPM / DBE: min = -100.0, max = 1000.0  
Element prediction: Off  
Number of isotope peaks used for i-FIT = 2

Monoisotopic Mass, Even Electron Ions

18 formula(e) evaluated with 1 results within limits (all results (up to 1000) for each mass)

Elements Used:

C: 0-4000 H: 0-4000 N: 3-3 O: 2-2

LHJ-654

0316\_LHJ-654\_3\_2 (0.109) Cm (2-1)

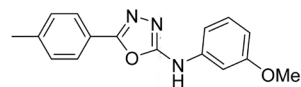

LHJ-654

19-Mar-2012  
16:03:00  
1: TOF MS ES-  
6.33e+003

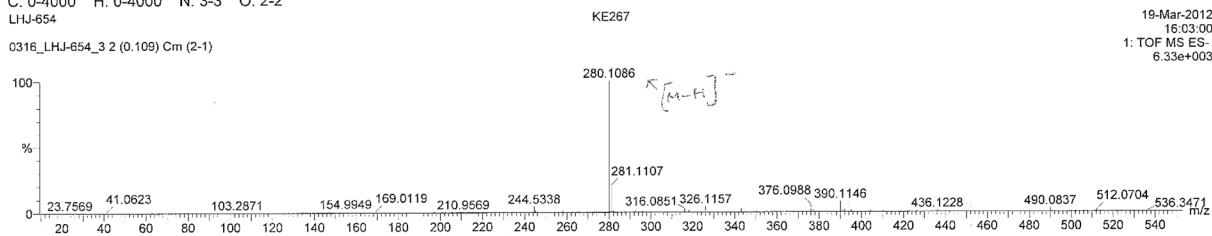

| Minimum: | Maximum: | Mass     | Calc. Mass | mDa | PPM | DBE  | i-FIT | i-FIT (Norm) | Formula       |
|----------|----------|----------|------------|-----|-----|------|-------|--------------|---------------|
| -100.0   | 1000.0   | 280.1086 | 280.1086   | 0.0 | 0.0 | 11.5 | 125.3 | 0.0          | C16 H14 N3 O2 |

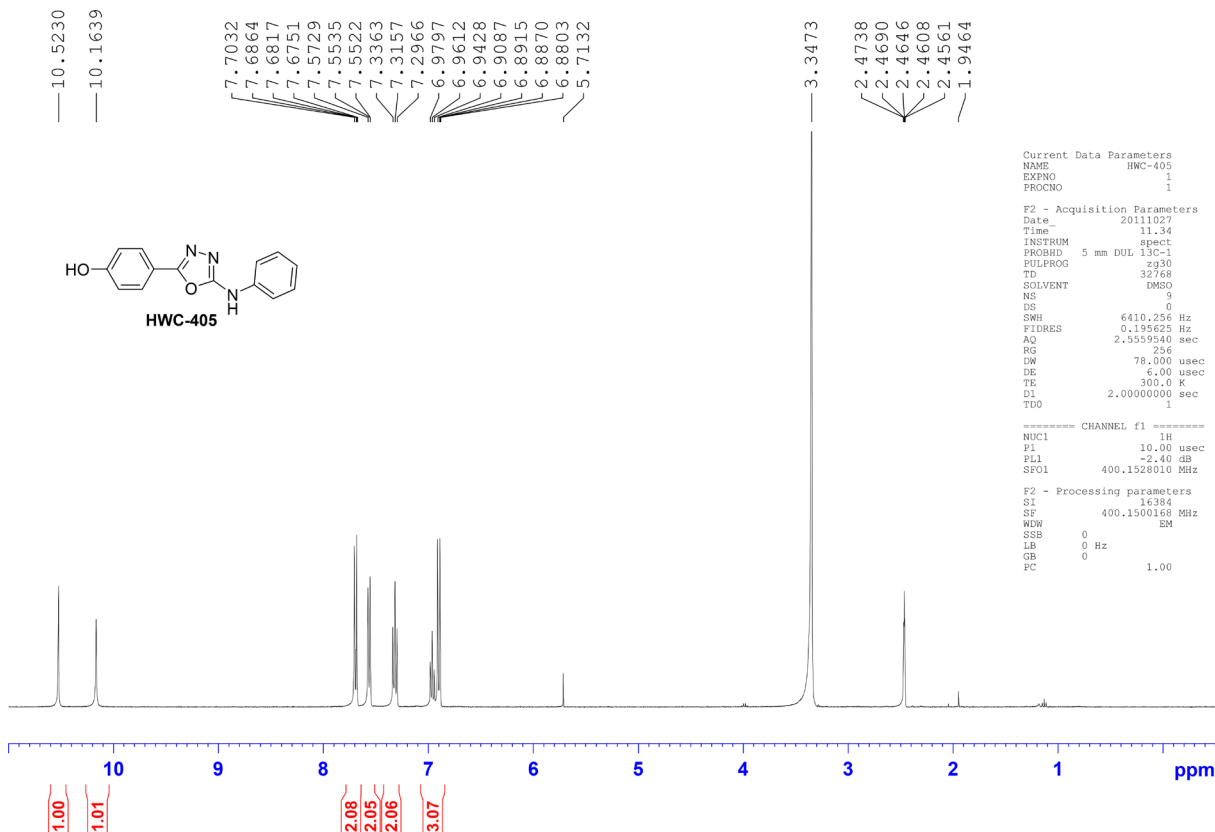

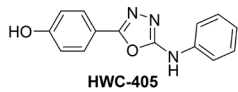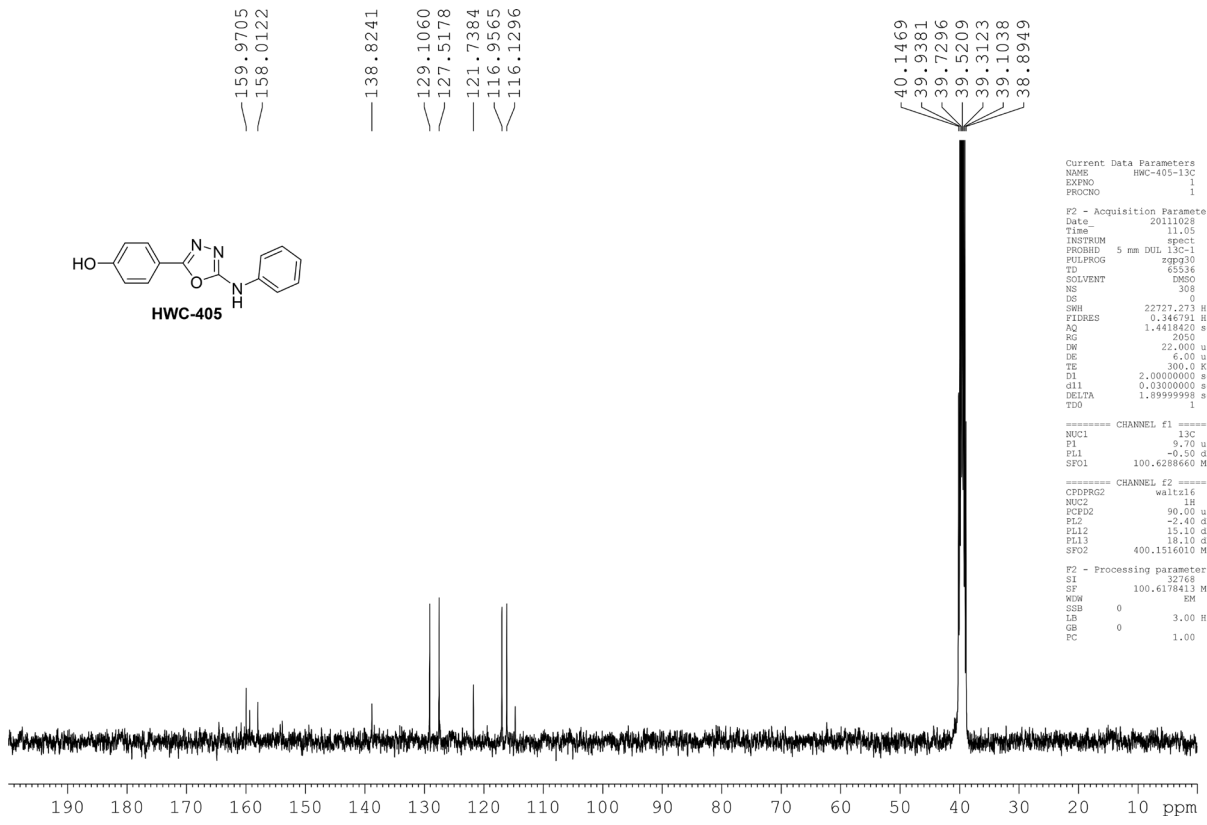

```

Current Data Parameters
NAME      HWC-405-13C
EXPNO    1
PROCNO   1

F2 - Acquisition Parameters
Date_    2011028
Time     11:05
INSTRUM  spect
PROBHD   5 mm DUL 13C-1
PULPROG  zgpg30
TD        65536
SOLVENT  DMSO
NS        308
DS        0
SWH       22727.273 Hz
FIDRES   0.346791 Hz
AQ        1.4418420 sec
RG        2050
DW        22.000 use
DE        6.000 use
TE        300.0 K
D1        2.00000000 sec
d11       0.03000000 sec
DELTA    1.89999999 sec
TD0       1

===== CHANNEL f1 =====
NUC1      13C
P1        9.70 use
PL1       -0.50 dB
SFO1      100.6288660 MHz

===== CHANNEL f2 =====
CPDPRG2  waltz16
NUC2      1H
PCPD2    90.00 use
PL2      -2.40 dB
PL12     15.10 dB
PL13     18.10 dB
SFO2     400.1516010 MHz

F2 - Processing parameters
SI        32768
SF        100.6178413 MHz
WDW       EM
SSB       0
LB        3.00 Hz
GB        0
PC        1.00
  
```

HWC-405 (HR-ESI-MS)  
**Elemental Composition Report**

**Single Mass Analysis**  
 Tolerance = 100.0 PPM / DBE: min = -100.0, max = 1000.0  
 Element prediction: Off  
 Number of isotope peaks used for i-FIT = 2

Monoisotopic Mass, Even Electron Ions  
 15 formula(e) evaluated with 1 results within limits (all results (up to 1000) for each mass)  
 Elements Used:  
 C: 0-1000 H: 0-4000 N: 3-3 O: 2-2  
 HWC-405

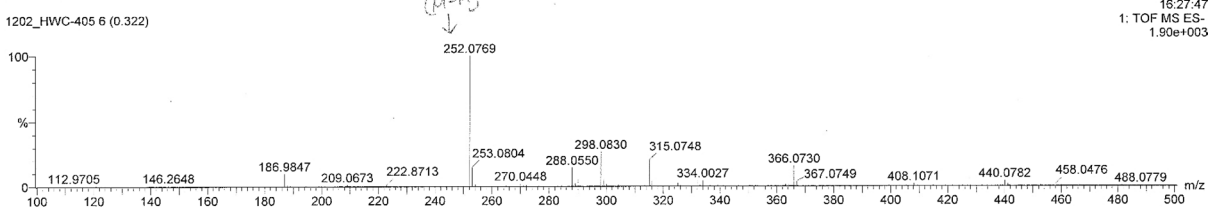

1202\_HWC-405 6 (0.322)

| Minimum: | 5.0        | 100.0 | -100.0 |      |       |              |               |  |  |
|----------|------------|-------|--------|------|-------|--------------|---------------|--|--|
| Maximum: |            |       | 1000.0 |      |       |              |               |  |  |
| Mass     | Calc. Mass | mDa   | PPM    | DBE  | i-FIT | i-FIT (Norm) | Formula       |  |  |
| 252.0769 | 252.0773   | -0.4  | -1.6   | 11.5 | 62.1  | 0.0          | C14 H10 N3 O2 |  |  |

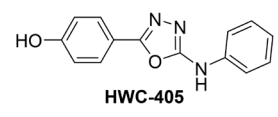

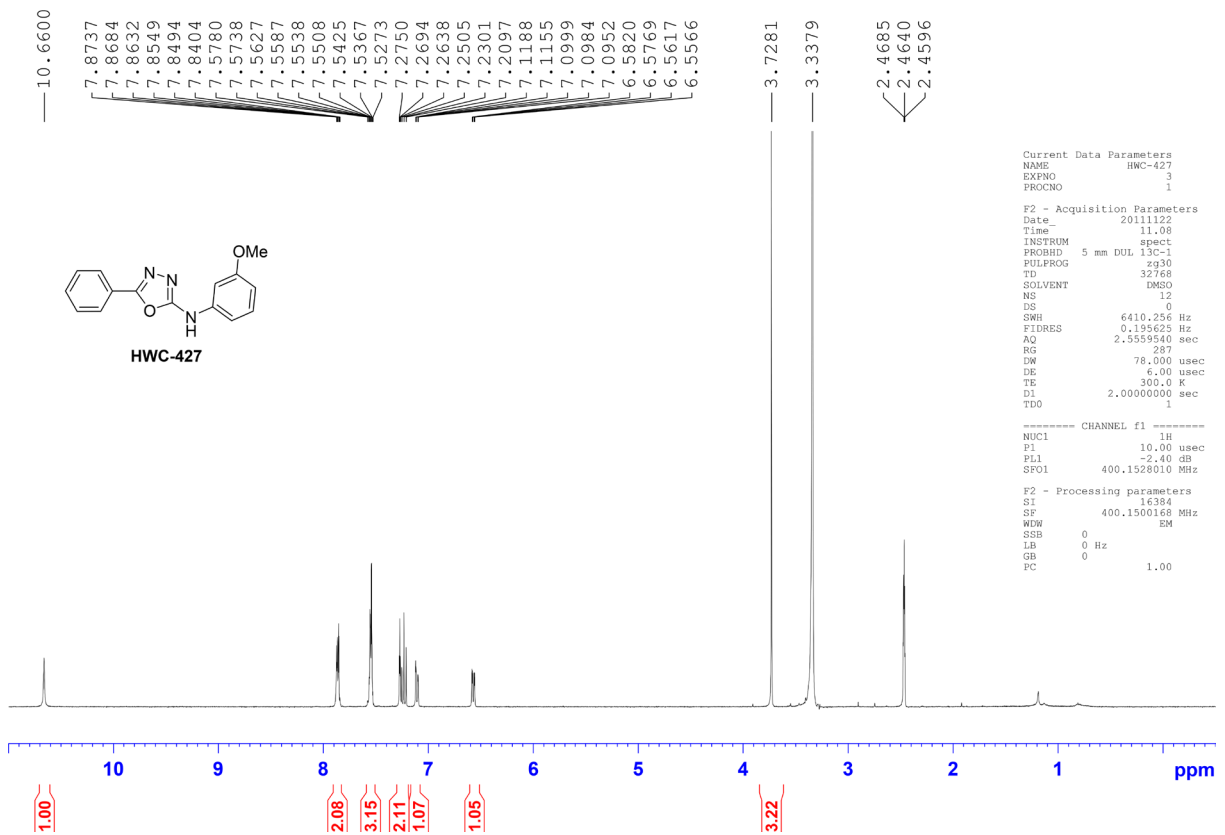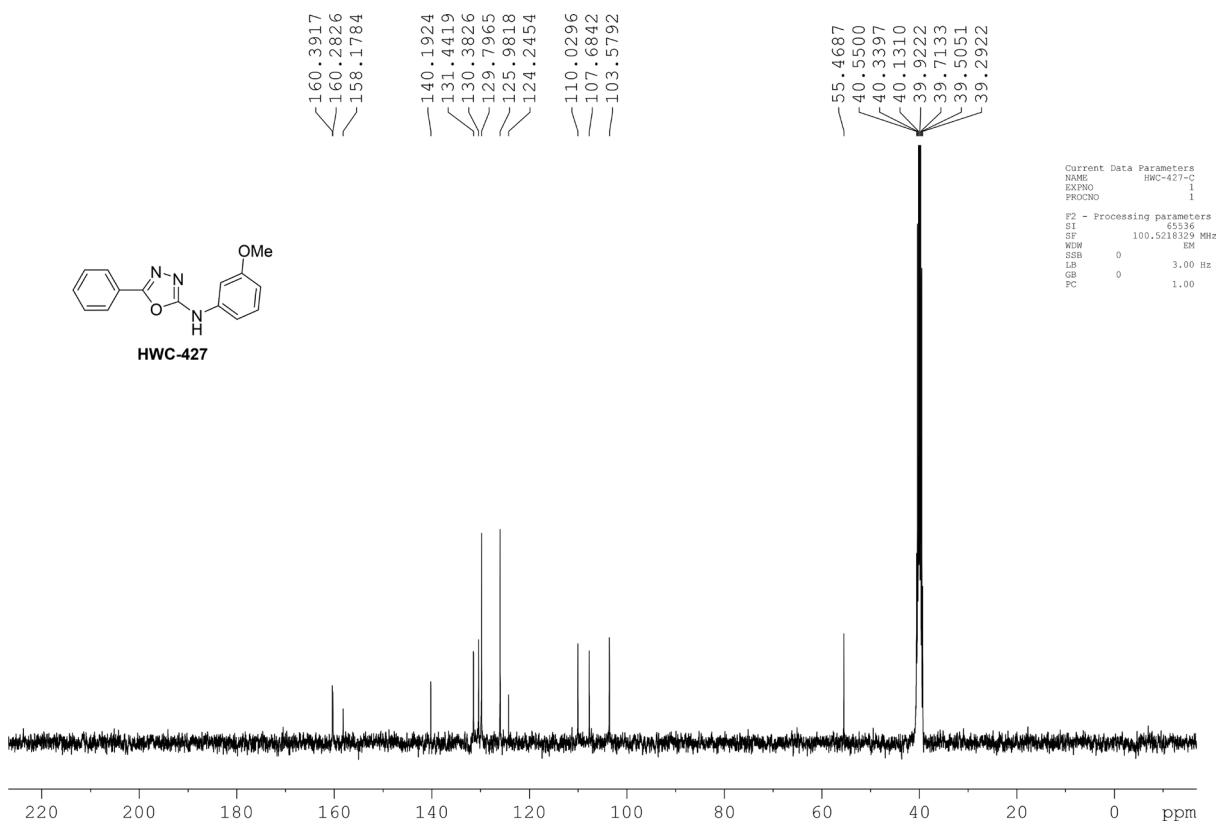

HWC-427 (HR-ESI-MS)

### Elemental Composition Report

#### Single Mass Analysis

Tolerance = 100.0 PPM / DBE: min = -100.0, max = 1000.0

Element prediction: Off

Number of isotope peaks used for i-FIT = 2

Monoisotopic Mass, Even Electron Ions

17 formula(e) evaluated with 1 results within limits (all results (up to 1000) for each mass)

Elements Used:

C: 0-1000 H: 0-4000 N: 3-3 O: 2-2

HWC-427

1202\_HWC-427 19 (1.037) Cm (19-1)

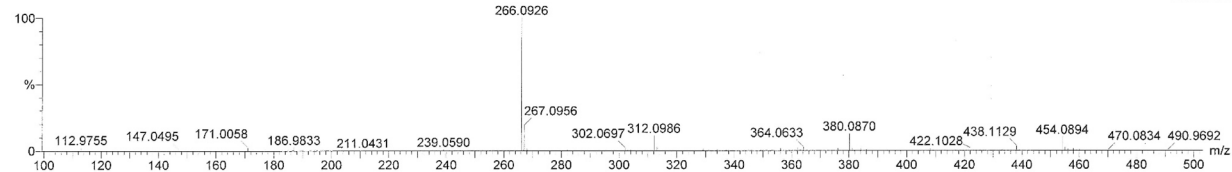

Minimum:  
Maximum:

5.0 100.0 -100.0  
1000.0

| Mass     | Calc. Mass | mDa  | PPM  | DBE  | i-FIT | i-FIT (Norm) | Formula       |
|----------|------------|------|------|------|-------|--------------|---------------|
| 266.0926 | 266.0930   | -0.4 | -1.5 | 11.5 | 183.2 | 0.0          | C15 H12 N3 O2 |

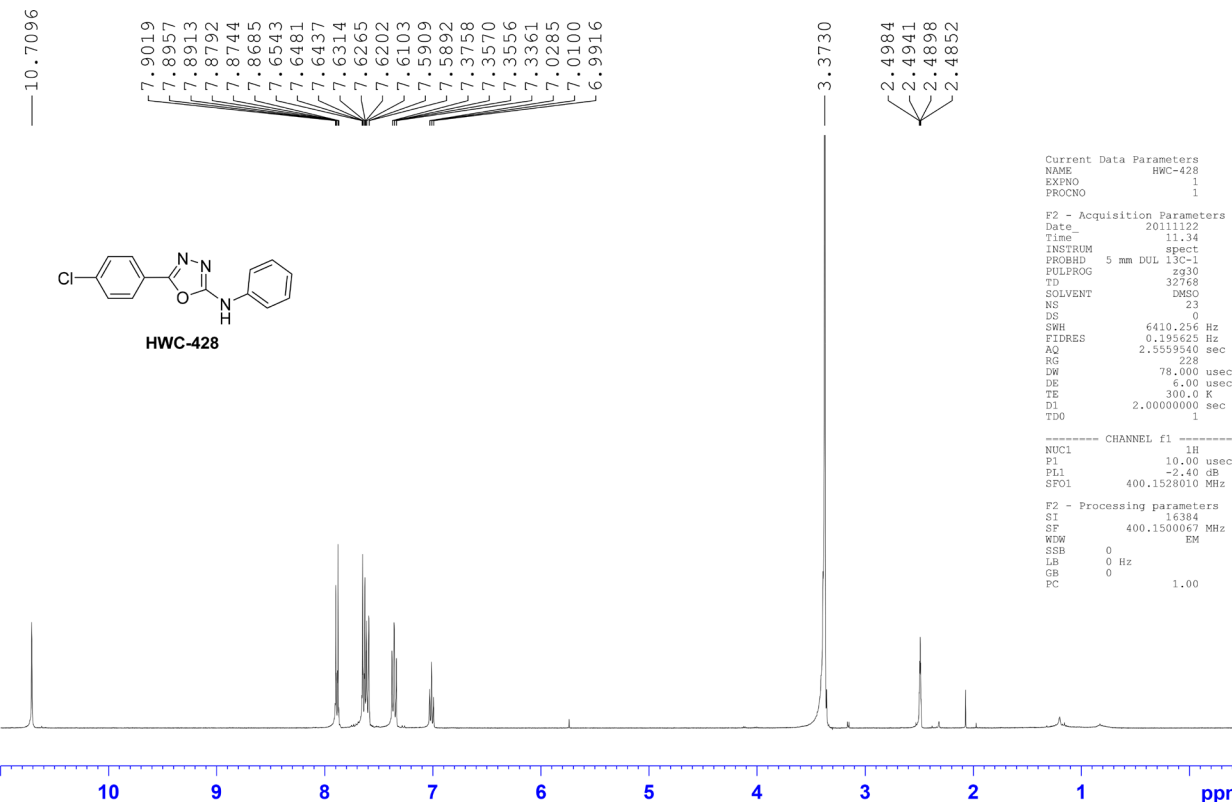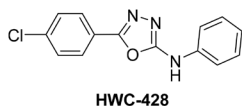

Current Data Parameters  
NAME HWC-428  
EXPNO 1  
PROCNO 1

F2 - Acquisition Parameters  
Date\_ 2011122  
Time 11.34  
INSTRUM spect  
PROBHD 5 mm DUL 13C-1  
FULPROG zg30  
TD 32768  
SOLVENT DMSO  
NS 23  
DS 0  
SWH 6410.256 Hz  
FIDRES 0.19525 Hz  
AQ 2.5559540 sec  
RG 228  
DW 78.000 usec  
DE 6.00 usec  
TE 300.0 K  
D1 2.0000000 sec  
TD0 1

CHANNEL f1  
NUC1 1H  
P1 10.00 usec  
PL1 -2.40 dB  
SFO1 400.1528010 MHz

F2 - Processing parameters  
SI 16384  
SF 400.1500067 MHz  
WDW EM  
SSB 0  
LB 0 Hz  
GB 0  
PC 1.00

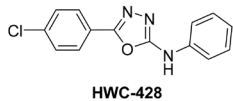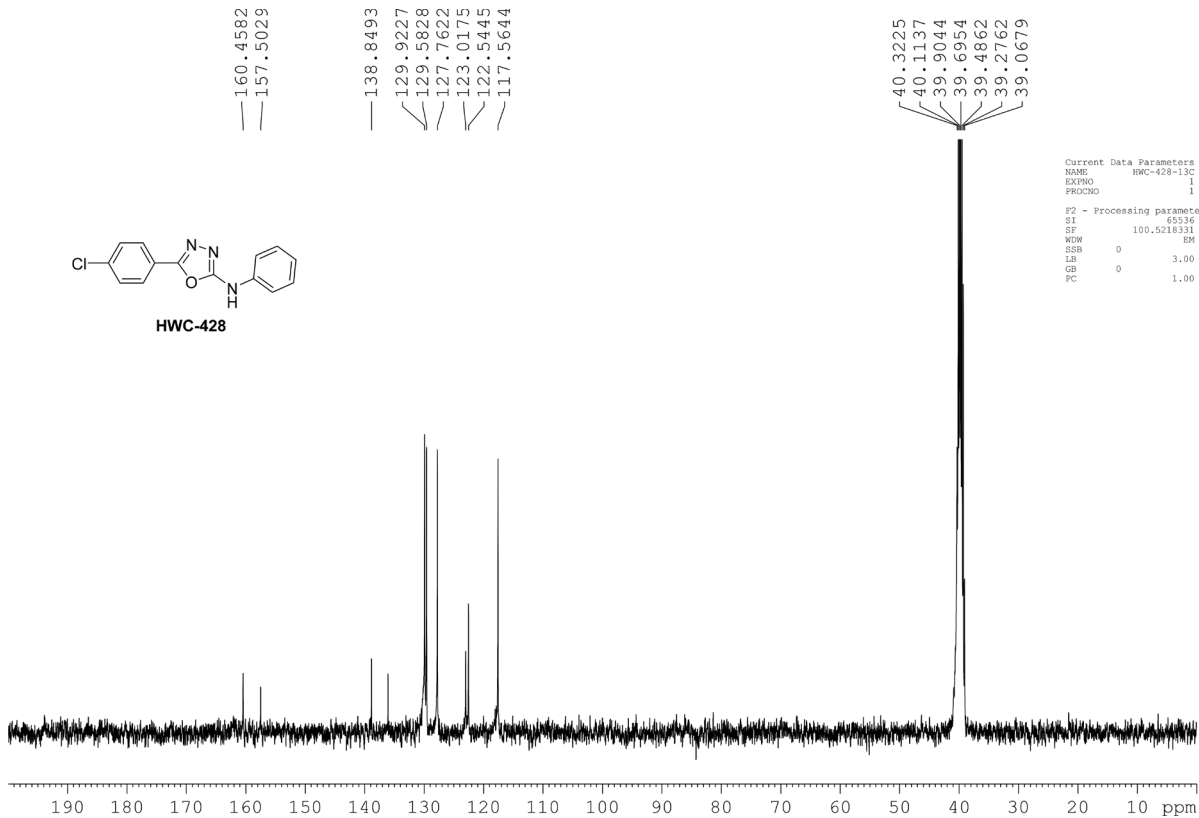

Current Data Parameters  
 NAME HWC-428-13C  
 EXPNO 1  
 PROCNO 1  
 F2 - Processing parameters  
 SI 5536  
 SF 100.5218131 MHz  
 KW EM  
 SSB 0  
 LB 3.00 Hz  
 GB 0  
 PC 1.00

HWC-428 (4K-ESS mag)

**Elemental Composition Report**

**Single Mass Analysis**  
 Tolerance = 100.0 PPM / DBE: min = -100.0, max = 1000.0  
 Element prediction: Off  
 Number of isotope peaks used for i-FIT = 2

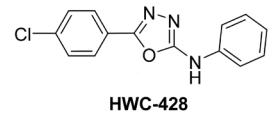

Monoisotopic Mass, Even Electron Ions  
 15 formula(e) evaluated with 1 results within limits (all results (up to 1000) for each mass)  
 Elements Used:  
 C: 0-1000 H: 0-4000 N: 3-3 O: 1-1 Cl: 1-1  
 HWC-428

1202\_HWC-428 4 (0.216) Cm (4-1)

$[M+H]^+$  KE267

05-Dec-2011  
 17:01:31  
 1: TOF MS ES-  
 1.97e+004

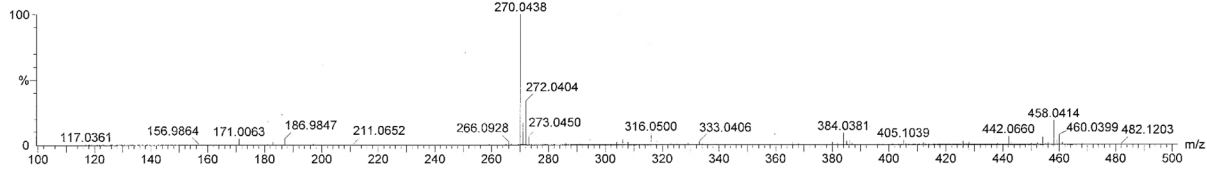

| Mass     | Calc. Mass | mDa | PPM | DBE  | i-FIT | i-FIT (Norm) | Formula        |
|----------|------------|-----|-----|------|-------|--------------|----------------|
| 270.0438 | 270.0434   | 0.4 | 1.5 | 11.5 | 217.7 | 0.0          | C14 H9 N3 O Cl |

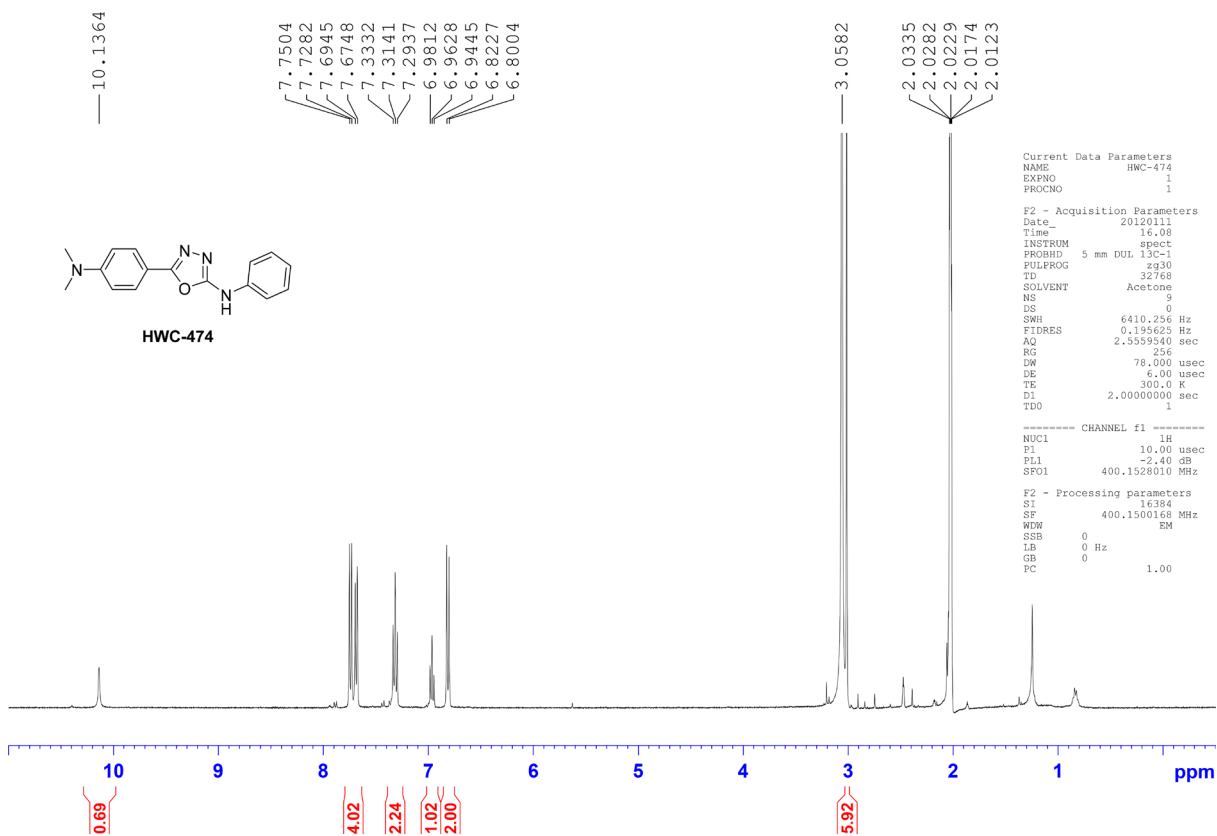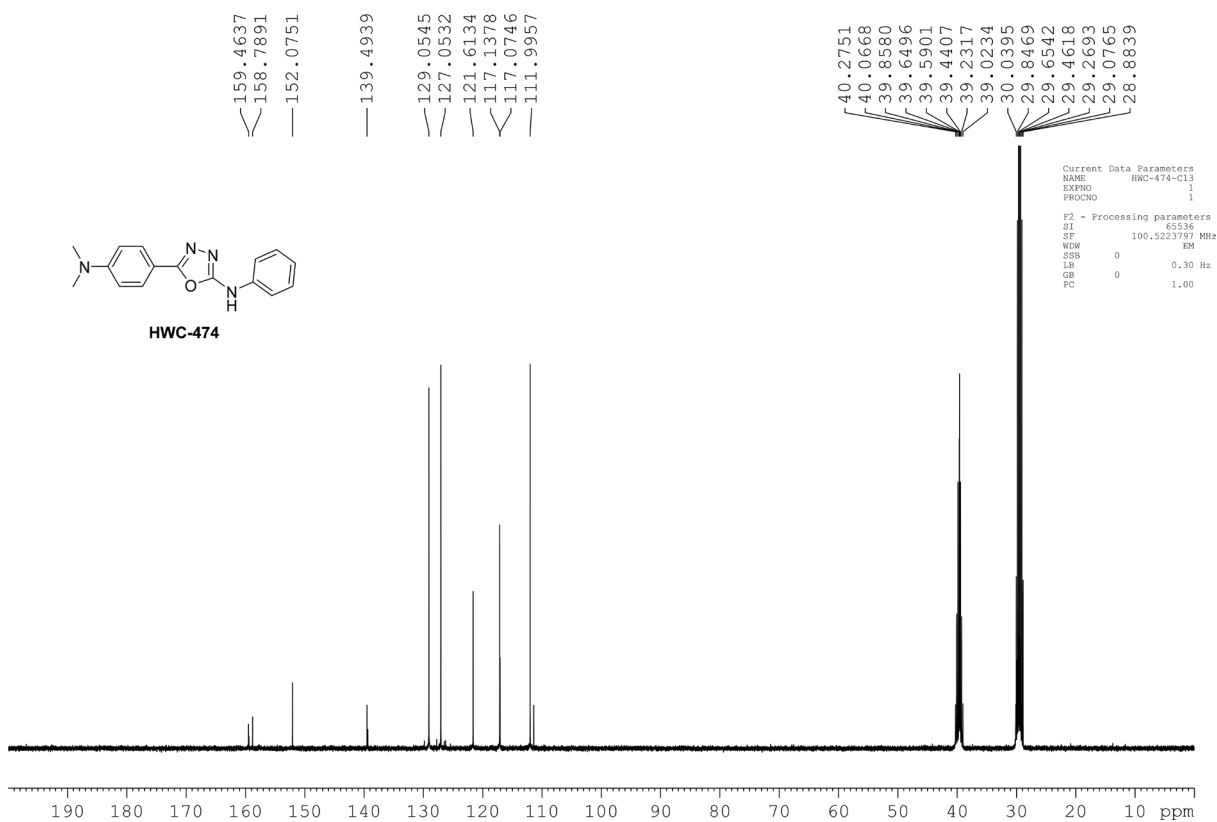

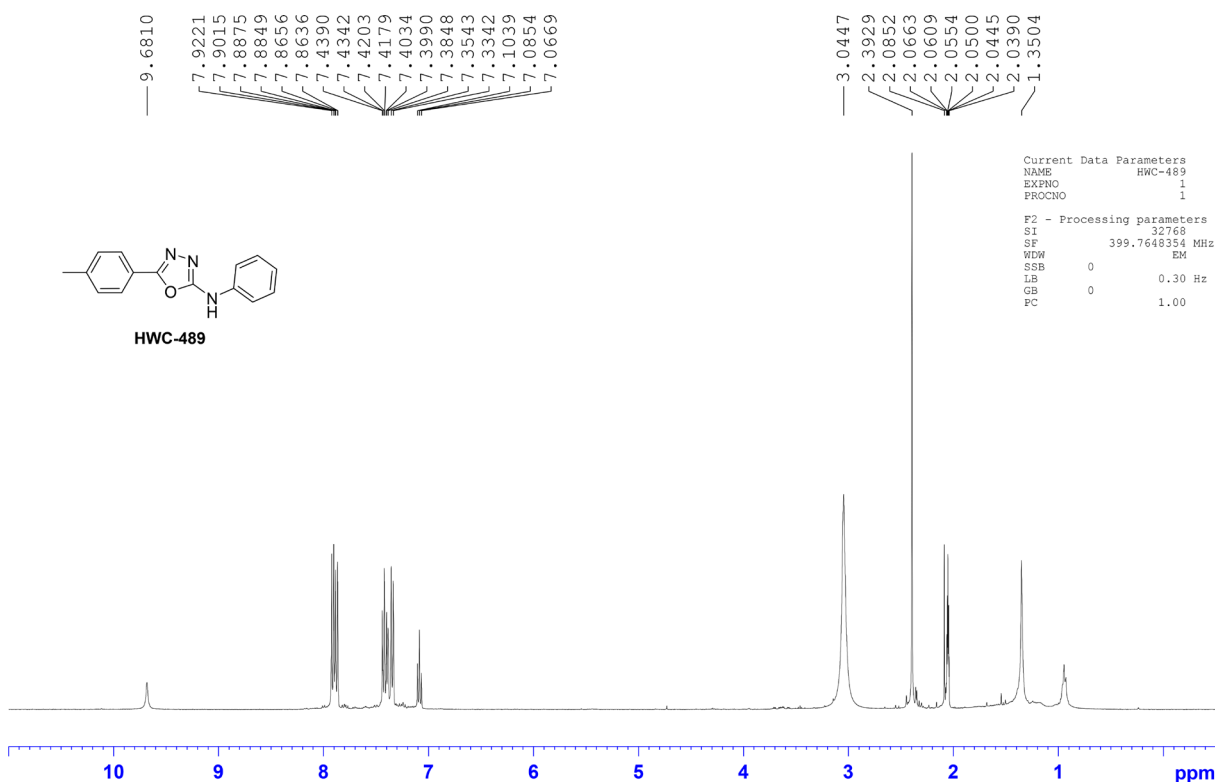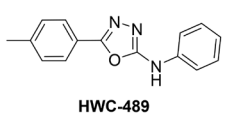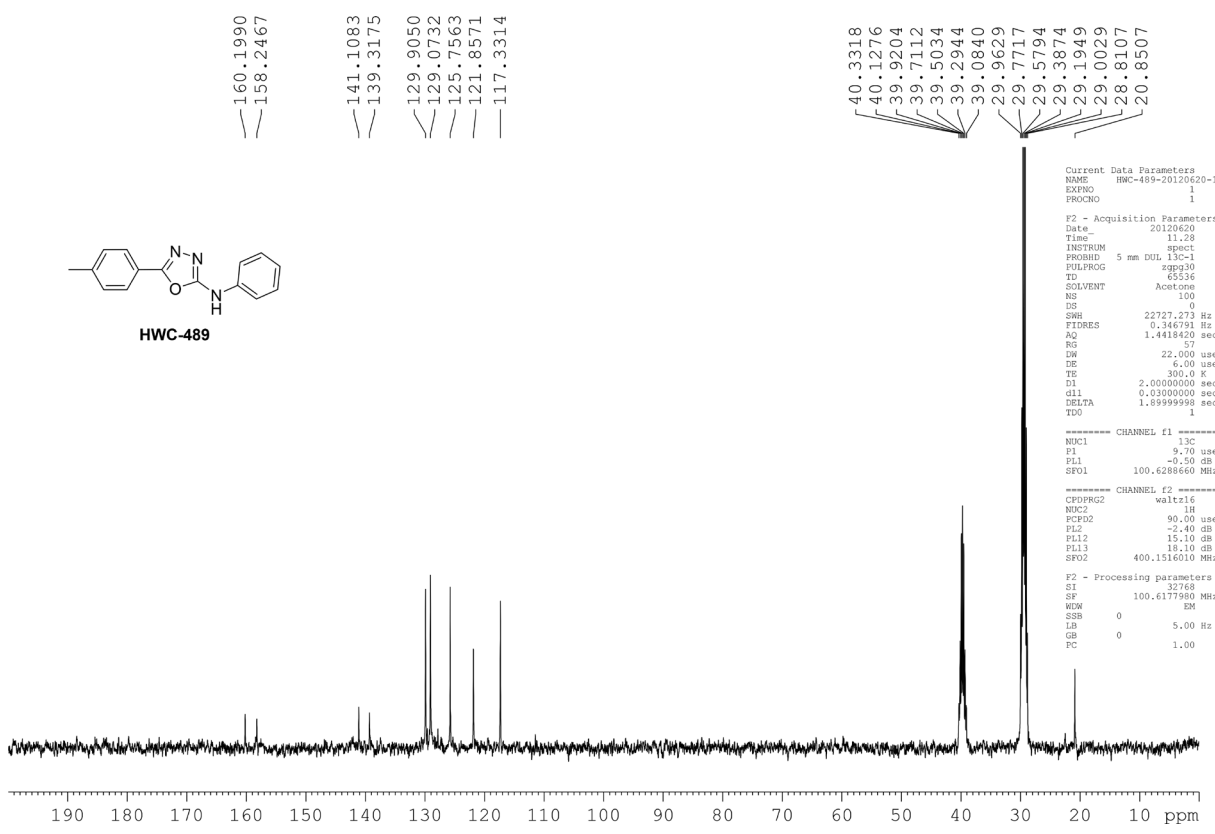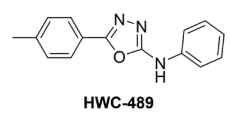



HWC-489 CHR-ESI neg?

### Elemental Composition Report

#### Single Mass Analysis

Tolerance = 20.0 PPM / DBE: min = -100.0, max = 1000.0  
Element prediction: Off  
Number of isotope peaks used for i-FIT = 2

Monoisotopic Mass, Even Electron Ions

17 formula(e) evaluated with 1 results within limits (all results (up to 1000) for each mass)

Elements Used:

C: 0-4000 H: 0-4000 N: 3-3 O: 1-1

HWC-489

KE267

Page 1

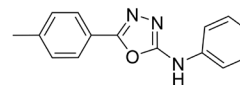

HWC-489

0307\_HWC-489 10 (1.013) Cm (10-2)

07-Mar-2012  
12:33:52  
2: TOF MS ES-  
3.58e+003

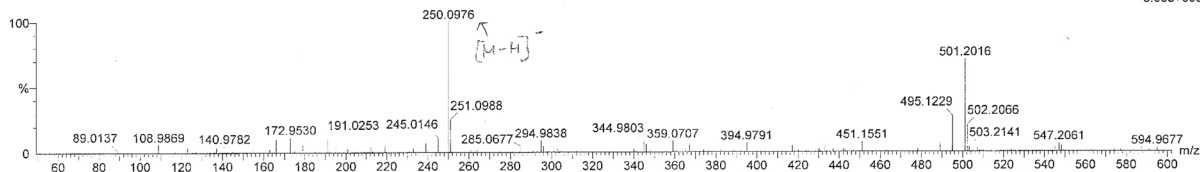

Minimum: -100.0  
Maximum: 1000.0

| Mass     | Calc. Mass | mDa  | PPM  | DBE  | i-FIT | i-FIT (Norm) | Formula      |
|----------|------------|------|------|------|-------|--------------|--------------|
| 250.0976 | 250.0980   | -0.4 | -1.6 | 11.5 | 57.3  | 0.0          | C15 H12 N3 O |

Supplementary Figure 1: Synthesis pathways of oxadiazole derivatives.
